# Supplementary material for: The impact of ammonia on particle formation in the Asian Tropopause Aerosol Layer
Source: Springer Nature journal article supplement (doi:10.1038/s41612-024-00758-3), 2024-09-12
Supplement: MOESM1 [file 41612_2024_758_MOESM1_ESM.pdf]

# Supplementary Information

## Additional Model Evaluation

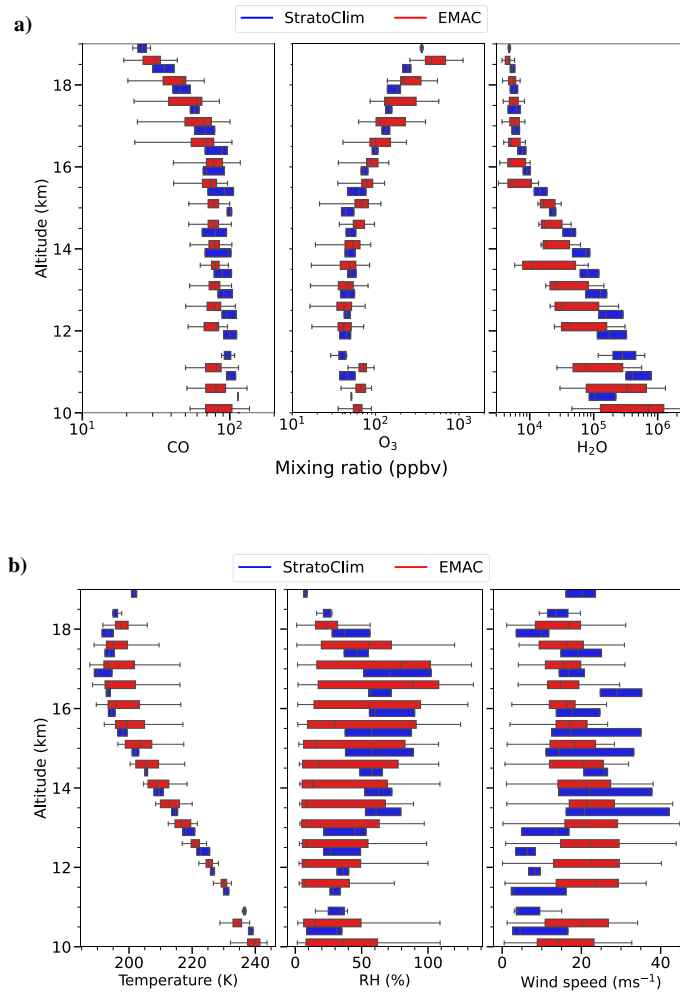

**Supplementary Fig. 1 Further Evaluation of EMAC Model against StratoClim 2017 Observations.** a) Vertical profiles of carbon monoxide (CO), ozone (O<sub>3</sub>), and water vapour (H<sub>2</sub>O) mixing ratios. b) Vertical profiles of atmospheric temperature, relative humidity (RH), and wind speed. Model data are compared to all eight flights during StratoClim between 27 July and 10 August 2017. Boxplots represent the distribution of observed (StratoClim) and modelled (EMAC) values. The central line of each boxplot denotes the median value, while the box boundaries indicate the interquartile range. The whiskers represent the range limits.

001  
002  
003  
004  
005  
006  
007  
008  
009  
010  
011  
012  
013  
014  
015  
016  
017  
018  
019  
020  
021  
022  
023  
024  
025  
026  
027  
028  
029  
030  
031  
032  
033  
034  
035  
036  
037  
038  
039  
040  
041  
042  
043  
044  
045  
046

047 **Anticyclone Evolution and Particle Number Concentration**

048

049

050

051

052

053

054

055

056

057

058

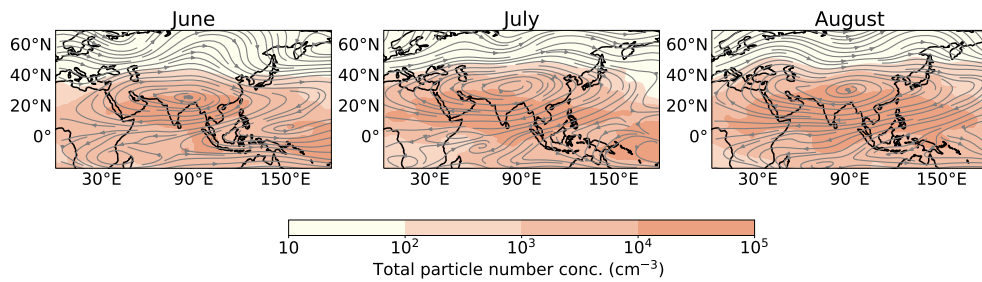

059 **Supplementary Fig. 2 Anticyclone Evolution and Particle Number Concentration.** The  
060 maps illustrate the monthly progression of the South Asian monsoon anticyclone and the associated  
061 distribution of particle number concentration as simulated by the EMAC model at 16 km altitude  
062 in the summer of 2017. The colour scale represents the total particle number concentration. All  
063 concentrations are calculated at ambient temperature and pressure. Grey arrows denote wind direction,  
064 highlighting how aerosols are confined near the anticyclone centre during the monsoon season.

064

065

066

067

068

069

070

071

072

073

074

075

076

077

078

079

080

081

082

083

084

085

086

087

088

089

090

091

092

## Interannual Variability

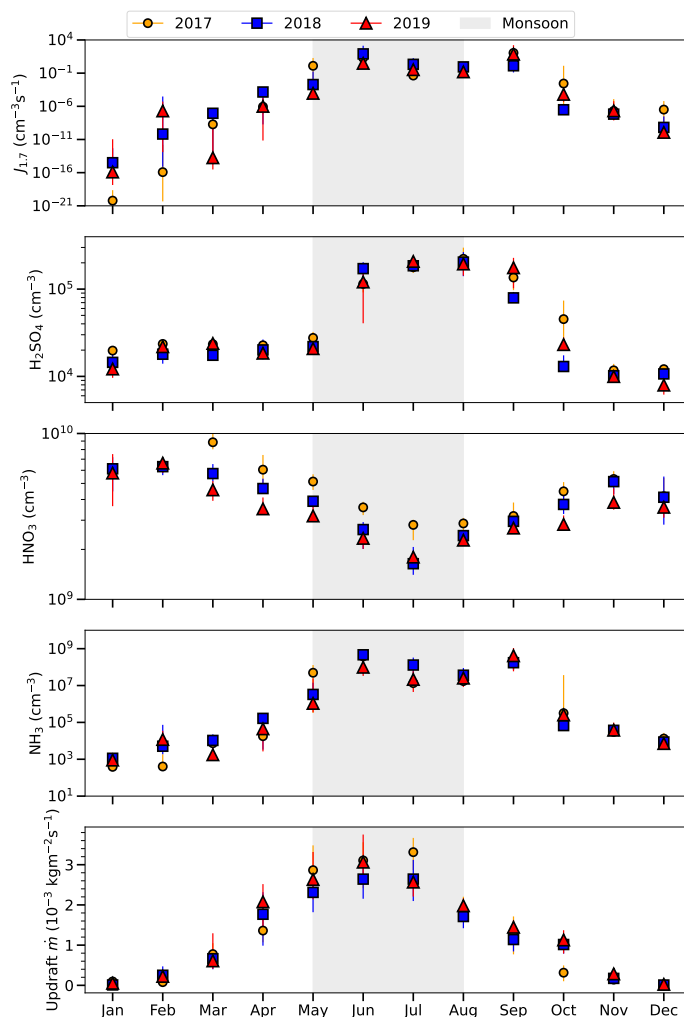

**Supplementary Fig. 3 Temporal Variability.** EMAC model simulation monthly median values for the nucleation rate at 1.7 nm ( $J_{1.7}$ ), concentrations of precursor gases ( $\text{H}_2\text{SO}_4$ ,  $\text{HNO}_3$ ,  $\text{NH}_3$ ), and updraft mass flux rate ( $\dot{m}$ ) associated with deep convection across the South Asian monsoon region for 2017 (orange circles), 2018 (blue squares), and 2019 (red triangles). These simulations show the  $J_{1.7}$  and gas concentrations at 16 km altitude, where the peak  $J_{1.7}$  is reached within the ATAL. All concentrations are calculated at ambient temperature and pressure. Convective updrafts are shown at 5 km altitude, where vertical velocities are close to maximum. The vertical lines indicate the interquartile range. The grey region indicates the South Asian monsoon season.

093  
094  
095  
096  
097  
098  
099  
100  
101  
102  
103  
104  
105  
106  
107  
108  
109  
110  
111  
112  
113  
114  
115  
116  
117  
118  
119  
120  
121  
122  
123  
124  
125  
126  
127  
128  
129  
130  
131  
132  
133  
134  
135  
136  
137  
138

139 **Simulated NH<sub>3</sub> Surface Emissions**

140  
141  
142  
143  
144  
145  
146  
147  
148  
149  
150  
151  
152  
153  
154  
155  
156  
157  
158  
159  
160  
161  
162  
163  
164  
165  
166  
167  
168  
169  
170  
171  
172  
173  
174  
175  
176  
177  
178  
179  
180  
181  
182  
183  
184

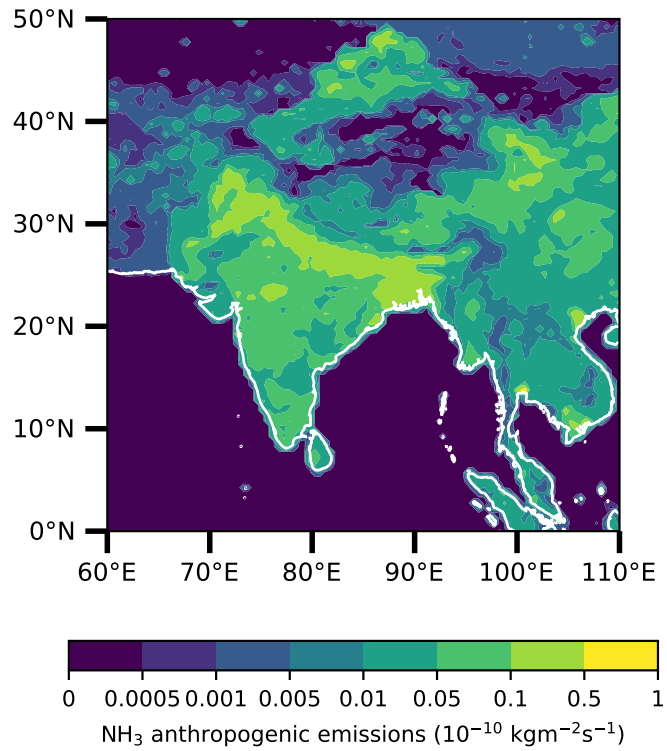

**Supplementary Fig. 4 Simulated NH<sub>3</sub> Surface Anthropogenic Emissions in Summer 2017.** This map depicts the simulated surface anthropogenic emissions of NH<sub>3</sub> across the South Asian monsoon region for the summer of 2017. Emissions data are derived using the Community Emissions Data System (CEDS) integrated into the EMAC model.
